# Supplementary material for: Systemic Inflammatory Biomarkers, Especially Fibrinogen to Albumin Ratio, Predict Prognosis in Patients with Pancreatic Cancer
Source: PubMed Central journal article supplement — Cancer Res Treat. 2020 Aug 24;53(1):131–9. doi: 10.4143/crt.2020.330 (PMC7811998; doi:10.4143/crt.2020.330), 2020-08-24
Supplement: crt-2020-330_S6Table.pdf [file crt-2020-330_S6Table.pdf]

**S6 Table.** ROC curve results based on FAR, MLR, NLR, and PLR of locally advanced or metastatic PC patients in training set

| Biomarker | Best cut-off point | AUC (95% CI)        | Sensitivity of Youden index | Specificity of Youden index |
|-----------|--------------------|---------------------|-----------------------------|-----------------------------|
| NLR       | 2.61               | 0.558 (0.507-0.609) | 0.416                       | 0.721                       |
| PLR       | 170.73             | 0.548 (0.498-0.598) | 0.761                       | 0.341                       |
| MLR       | 0.36               | 0.569 (0.519-0.619) | 0.635                       | 0.504                       |
| FAR       | 0.079              | 0.641 (0.594-0.689) | 0.635                       | 0.656                       |

AUC, the area under the ROC curve; CI, confidence interval; FAR, fibrinogen-to-albumin ratio; MLR, monocyte-to-lymphocyte ratio; NLR, neutrophil-to-lymphocyte ratio; PLR, platelet-to-lymphocyte ratio; ROC, receiver operating characteristic.
